# Supplementary material for: Diversity, Bacterial Symbionts, and Antimicrobial Potential of Termite-Associated Fungi
Source: PubMed Central journal article supplement (PMC7082625; doi:10.3389/fmicb.2020.00300), 2020-03-13
Supplement: Data_Sheet_2.pdf [file Data_Sheet_2.pdf]

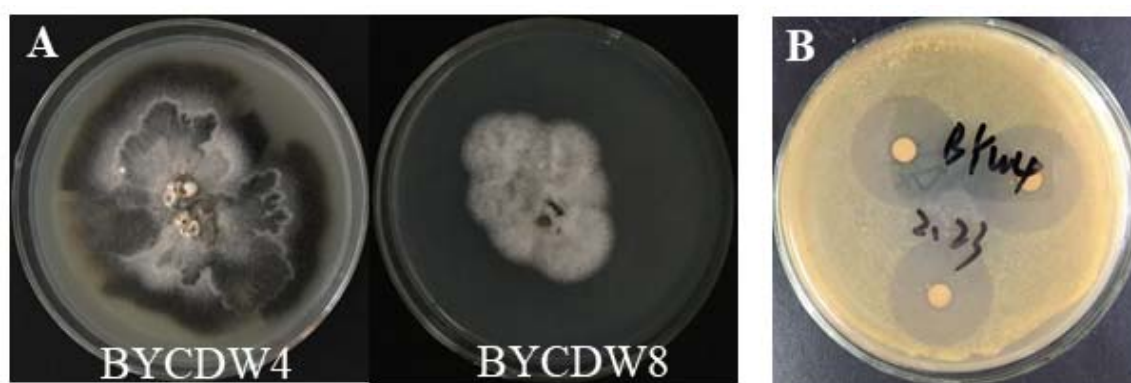

**Figure S1.** Colony of strains BYCDW4 and BYCDW8 (A), and antibacterial activity of BYCDW4 crude extract against *Staphylococcus aureus* (B).

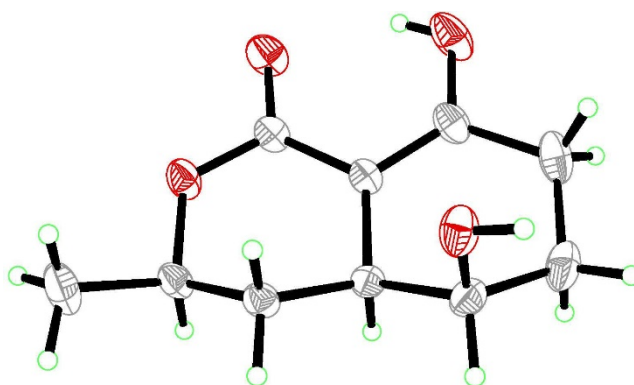

**Figure S2.** X-ray crystallographic 1a.
